# Supplementary material for: Proteomic Differences between Male and Female Anterior Cruciate Ligament and Patellar Tendon
Source: PLoS One. 2014 May 12;9(5):e96526. doi: 10.1371/journal.pone.0096526 (PMC4018326; doi:10.1371/journal.pone.0096526)
Supplement: Table S4 — Summed intensities of all peptides in patellar tendon (PT) for each protein by subject and differential abundance. (XLSX) [file pone.0096526.s005.xlsx]

## Sheet: PT protein_S4
Primary Protein Name	Protein description	ProteinTeller Probability	Peptide Count	Intensity [ID05031 (female-PT)]	Intensity [ID05032 (female-PT)]	Intensity [ID05033 (female-PT)]	Intensity [ID05034 (male-PT)]	Intensity [ID05035 (male-PT)]	Intensity [ID05036 (male-PT)]	Fold Change M/F	ANOVA p-value	Average Variation	T-Test p-value	Cohens d
ACTS_HUMAN	Actin, alpha skeletal muscle OS=Homo sapiens GN=ACTA1 PE=1 SV=1	1	9	968949	694321	698698	1.91466e+06	985546	1.26579e+06	1.76378	0.018	0.2715	0.106587	2.07531
ACTG_HUMAN	Actin, cytoplasmic 2 OS=Homo sapiens GN=ACTG1 PE=1 SV=1	0.87	1	77681.8	66538.5	111097	185622	144580	109760	1.72319	0.023	0.265699	0.0746843	2.39594
APC_HUMAN	Adenomatous polyposis coli protein OS=Homo sapiens GN=APC PE=1 SV=2	0.56	1	8516.68	7164.51	5125.63	6084.78	4778.17	3429.95	-1.45575	0.242	0.262381	0.156998	-1.73913
ADH1_YEAST	Alcohol dehydrogenase 1 OS=Saccharomyces cerevisiae GN=ADH1 PE=1 SV=4	1	18	10820000	13280000	11500000	11880000	8107934	15740000	1.00359	0.941	0.213741	0.986227	0.0183647
ADH1G_HUMAN	Alcohol dehydrogenase 1C OS=Homo sapiens GN=ADH1C PE=1 SV=2	0.55	1	106880	141633	112867	8735.34	18696.4	14392.1	-8.64053	9.381e-15	0.25629	0.000660786	-9.58984
A1AG1_HUMAN	Alpha-1-acid glycoprotein 1 OS=Homo sapiens GN=ORM1 PE=1 SV=1	0.68	1	68450	166275	57453.7	48120.3	105032	57139.4	-1.3894	0.539	0.525739	0.520894	-0.702863
AACT_HUMAN	Alpha-1-antichymotrypsin OS=Homo sapiens GN=SERPINA3 PE=1 SV=2	0.68	1	55885.2	84245.7	28762.7	22602.3	34377.9	30003.2	-1.94168	0.018	0.349047	0.170916	-1.66663
A1AT_HUMAN	Alpha-1-antitrypsin OS=Homo sapiens GN=SERPINA1 PE=1 SV=3	1	4	367392	591861	255314	387969	517890	354428	1.03764	0.958	0.314405	0.897236	0.137558
A20A4_HUMAN	Ankyrin repeat domain-containing protein 20A4 OS=Homo sapiens GN=ANKRD20A4 PE=2 SV=1	0.6	1	2129956	2.06775e+06	1.85533e+06	1.79051e+06	1.80764e+06	1.84451e+06	-1.11215	0.194	0.0432878	0.0740694	-2.40357
ANXA1_HUMAN	Annexin A1 OS=Homo sapiens GN=ANXA1 PE=1 SV=2	0.98	2	81691.8	55545.8	91051.4	130516	67024.8	166237	1.5935	0.127	0.328114	0.217612	1.46178
ANX10_HUMAN	Annexin A10 OS=Homo sapiens GN=ANXA10 PE=1 SV=3	0.62	1	2680.82	2867.87	2327.54	5451.64	4033.91	4634.64	1.79276	0.02	0.127852	0.00912643	4.72668
ANXA2_HUMAN	Annexin A2 OS=Homo sapiens GN=ANXA2 PE=1 SV=2	1	6	391282	296630	522058	678406	466474	741463	1.559	0.018	0.254878	0.10004	2.13149
ANXA5_HUMAN	Annexin A5 OS=Homo sapiens GN=ANXA5 PE=1 SV=2	1	4	162900	99405	180891	180159	127568	287048	1.34201	0.34	0.349834	0.394656	0.952779
APOA1_HUMAN	Apolipoprotein A-I OS=Homo sapiens GN=APOA1 PE=1 SV=1	0.66	1	18372.9	24951.6	33121.1	22549.2	43099.1	51943.6	1.53824	0.079	0.337342	0.230093	1.41461
APOE_HUMAN	Apolipoprotein E OS=Homo sapiens GN=APOE PE=1 SV=1	0.67	1	10521.1	12481.8	9402.8	21859.8	12295.7	7785.95	1.29426	0.488	0.329167	0.495676	0.748674
ASPN_HUMAN	Asporin OS=Homo sapiens GN=ASPN PE=1 SV=2	1	9	1.29854e+06	2.3784e+06	1.62403e+06	2.19092e+06	1.46475e+06	2.18988e+06	1.10273	0.448	0.264254	0.674232	0.452699
PGBM_HUMAN	Basement membrane-specific heparan sulfate proteoglycan core protein OS=Homo sapiens GN=HSPG2 PE=1 SV=3	1	4	106645	126213	110131	145052	96930.2	139724	1.11288	0.49	0.149312	0.474803	0.787935
PGS1_HUMAN	Biglycan OS=Homo sapiens GN=BGN PE=1 SV=2	1	18	4973015	2.89376e+06	4.62949e+06	4.00155e+06	3.86972e+06	5.30555e+06	1.05446	0.62	0.22414	0.788252	0.287159
BIG3_HUMAN	Brefeldin A-inhibited guanine nucleotide-exchange protein 3 OS=Homo sapiens GN=ARFGEF3 PE=1 SV=3	0.5	1	120043	200223	196758	142352	187027	113789	-1.16666	0.536	0.256437	0.506132	-0.729474
CADH3_HUMAN	Cadherin-3 OS=Homo sapiens GN=CDH3 PE=1 SV=2	0.67	1	414487	231577	170991	291565	72509.5	183702	-1.49158	0.565	0.53266	0.405938	-0.927993
CILP1_HUMAN	Cartilage intermediate layer protein 1 OS=Homo sapiens GN=CILP PE=1 SV=3	1	39	38920000	28170000	43540000	33820000	20460000	53530000	-1.02616	0.967	0.338392	0.933783	-0.0884334
CILP2_HUMAN	Cartilage intermediate layer protein 2 OS=Homo sapiens GN=CILP2 PE=2 SV=2	1	13	3329821	2.75299e+06	5934340	4.23013e+06	7600476	3.95603e+06	1.31368	0.548	0.404417	0.456731	0.823023
COMP_HUMAN	Cartilage oligomeric matrix protein OS=Homo sapiens GN=COMP PE=1 SV=2	1	51	38080000	28250000	44780000	42270000	26860000	43195000	1.01094	0.707	0.234776	0.957539	0.0566523
CD44_HUMAN	CD44 antigen OS=Homo sapiens GN=CD44 PE=1 SV=2	0.47	1	3086.65	4819.75	557.544	5537.55	4686.41	4563.4	1.7471	0.468	0.433681	0.173601	1.65336
CDC5L_HUMAN	Cell division cycle 5-like protein OS=Homo sapiens GN=CDC5L PE=1 SV=2	0.66	1	36891.1	30838.6	79396	23895.7	14750.4	80707.1	-1.23269	0.966	0.718875	0.736626	-0.360613
LYAR_HUMAN	Cell growth-regulating nucleolar protein OS=Homo sapiens GN=LYAR PE=1 SV=2	0.63	1	184391	204688	147515	37577.4	129673	125842	-1.8308	0.146	0.347667	0.0778311	-2.35802
CE164_HUMAN	Centrosomal protein of 164 kDa OS=Homo sapiens GN=CEP164 PE=1 SV=3	0.47	1	6980.72	8075.2	7580.36	10376.8	11334.1	5644.14	1.20846	0.565	0.203377	0.4285	0.880112
CLUS_HUMAN	Clusterin OS=Homo sapiens GN=CLU PE=1 SV=1	1	12	3.33204e+06	3490759	2.40288e+06	1.60943e+06	1.02304e+06	2.84258e+06	-1.68504	0.199	0.349991	0.120128	-1.9703
CO1A1_HUMAN	Collagen alpha-1(I) chain OS=Homo sapiens GN=COL1A1 PE=1 SV=4	1	520	3510000000	3651000000	4118000000	3360000000	3374000000	2678500000	-1.1983	0.021	0.105679	0.101787	-2.11611
CO2A1_HUMAN	Collagen alpha-1(II) chain OS=Homo sapiens GN=COL2A1 PE=1 SV=3	1	7	50390000	49870000	43490000	22110000	6238209	34130000	-2.3008	0.056	0.375975	0.0318489	-3.23419
CO3A1_HUMAN	Collagen alpha-1(III) chain OS=Homo sapiens GN=COL3A1 PE=1 SV=4	1	90	214200000	176600000	232200000	326200000	295400000	215400000	1.3435	0.188	0.1708	0.12505	1.93531
CO5A1_HUMAN	Collagen alpha-1(V) chain OS=Homo sapiens GN=COL5A1 PE=1 SV=3	0.97	1	4726211	5074377	3.25492e+06	5232887	4.96914e+06	6.84245e+06	1.30554	0.056	0.200202	0.175396	1.64461
CO6A1_HUMAN	Collagen alpha-1(VI) chain OS=Homo sapiens GN=COL6A1 PE=1 SV=3	1	61	19820000	22740000	25500000	31740000	38750000	25740000	1.4139	0.045	0.1641	0.0839137	2.28939
CO8A1_HUMAN	Collagen alpha-1(VIII) chain OS=Homo sapiens GN=COL8A1 PE=2 SV=2	0.68	1	778594	879555	1.4899e+06	1.21188e+06	1.67508e+06	1.27216e+06	1.32118	0.188	0.274204	0.273191	1.26921
COCA1_HUMAN	Collagen alpha-1(XII) chain OS=Homo sapiens GN=COL12A1 PE=1 SV=2	1	69	16700000	15330000	10310000	13970000	12350000	13150000	-1.07271	0.629	0.149971	0.657049	-0.478845
CO1A2_HUMAN	Collagen alpha-2(I) chain OS=Homo sapiens GN=COL1A2 PE=1 SV=6	1	374	2458000000	2431000000	2752000000	2330000000	2441000000	2045500000	-1.12096	0.042	0.0798422	0.153563	-1.75806
CO4A2_HUMAN	Collagen alpha-2(IV) chain OS=Homo sapiens GN=COL4A2 PE=1 SV=4	0.96	2	103413	241178	189400	196613	143969	128458	-1.13848	0.669	0.309718	0.656684	-0.479405
CO5A2_HUMAN	Collagen alpha-2(V) chain OS=Homo sapiens GN=COL5A2 PE=1 SV=3	1	1	1.23263e+06	1.29188e+06	1.44888e+06	1.21221e+06	1218898	1.74617e+06	1.05132	0.601	0.152197	0.736367	0.360986
CO6A2_HUMAN	Collagen alpha-2(VI) chain OS=Homo sapiens GN=COL6A2 PE=1 SV=4	1	30	8945765	8625407	10260000	11060000	20720000	10810000	1.5303	0.133	0.245702	0.21034	1.49053
CO8A2_HUMAN	Collagen alpha-2(VIII) chain OS=Homo sapiens GN=COL8A2 PE=1 SV=2	0.68	1	230342	189644	90615.4	106058	117397	183465	-1.25479	0.656	0.365214	0.511348	-0.720007
CO6A3_HUMAN	Collagen alpha-3(VI) chain OS=Homo sapiens GN=COL6A3 PE=1 SV=4	1	174	44410000	44890000	53290000	48980000	90130000	55570000	1.36531	0.195	0.222835	0.255127	1.32721
C1T9B_HUMAN	Complement C1q tumor necrosis factor-related protein 9A OS=Homo sapiens GN=C1QTNF9 PE=1 SV=1	0.46	1	726290	192441	556659	663460	661609	657470	1.34374	0.325	0.279641	0.343546	1.07337
CO3_HUMAN	Complement C3 OS=Homo sapiens GN=C3 PE=1 SV=2	0.85	2	108979	132491	60062.5	96564.7	74441.8	185712	1.18302	0.615	0.431497	0.670586	0.458216
CO9_HUMAN	Complement component C9 OS=Homo sapiens GN=C9 PE=1 SV=2	0.87	2	83486.4	57014	28970.3	12662.2	17805.4	50390.1	-2.09591	0.244	0.620847	0.207764	-1.50096
CTTB2_HUMAN	Cortactin-binding protein 2 OS=Homo sapiens GN=CTTNBP2 PE=1 SV=1	0.67	1	6505585	2.88423e+06	2.27398e+06	5838704	4.16384e+06	256442	-1.13693	0.325	0.713005	0.835732	-0.221252
CSMD1_HUMAN	CUB and sushi domain-containing protein 1 OS=Homo sapiens GN=CSMD1 PE=1 SV=2	0.46	1	19053.5	19148	20097.9	16029.9	6807.27	37089.6	1.02791	0.62	0.403385	0.954667	0.0604902
PA24F_HUMAN	Cytosolic phospholipase A2 zeta OS=Homo sapiens GN=PLA2G4F PE=2 SV=2	0.55	1	116295	150646	24776.1	22236.4	1	79974	-2.85406	0.415	0.940338	0.228643	-1.41995
PGS2_HUMAN	Decorin OS=Homo sapiens GN=DCN PE=1 SV=1	1	25	18120000	18100000	20480000	18810000	18840000	18170000	-1.01576	0.751	0.04637	0.738531	-0.357863
DEN5B_HUMAN	DENN domain-containing protein 5B OS=Homo sapiens GN=DENND5B PE=1 SV=2	0.66	1	18316.4	12125.3	17009.6	16903.8	13553.1	5965.65	-1.3028	0.584	0.333955	0.381758	-0.981865
DERM_HUMAN	Dermatopontin OS=Homo sapiens GN=DPT PE=2 SV=2	0.68	1	60045.2	65228.5	32035	91188.8	41334.8	84338.7	1.37858	0.516	0.357192	0.348295	1.06152
ADA15_HUMAN	Disintegrin and metalloproteinase domain-containing protein 15 OS=Homo sapiens GN=ADAM15 PE=1 SV=2	0.57	1	7.40406e+06	5.17319e+06	4.81047e+06	2.5531e+06	852097	6.50222e+06	-1.75502	0.359	0.560019	0.251058	-1.34082
DPOLZ_HUMAN	DNA polymerase zeta catalytic subunit OS=Homo sapiens GN=REV3L PE=1 SV=2	0.48	1	76837.4	79353	181879	175918	670443	70996	2.71352	0.244	0.789374	0.362508	1.0269
DYH11_HUMAN	Dynein heavy chain 11, axonemal OS=Homo sapiens GN=DNAH11 PE=1 SV=2	0.56	1	36496.1	32810.6	20120.8	40201.1	25813.4	34904.4	1.1285	0.751	0.252247	0.587325	0.589315
EHD2_HUMAN	EH domain-containing protein 2 OS=Homo sapiens GN=EHD2 PE=1 SV=2	0.79	1	35440.7	22065.1	48592.3	40815.6	28711.3	38030.2	1.01375	0.958	0.275929	0.957055	0.0572998
ELN_HUMAN	Elastin OS=Homo sapiens GN=ELN PE=1 SV=2	1	4	198580	271060	176838	292692	173505	278294	1.15161	0.536	0.245544	0.526393	0.693089
ETUD1_HUMAN	Elongation factor Tu GTP-binding domain-containing protein 1 OS=Homo sapiens GN=EFTUD1 PE=1 SV=2	0.62	1	19466.3	12620.3	11453.9	16471.1	7207.41	6674.86	-1.43445	0.539	0.42135	0.338255	-1.08674
SREC_HUMAN	Endothelial cells scavenger receptor OS=Homo sapiens GN=SCARF1 PE=1 SV=3	0.64	1	2796.02	2798.48	4065.05	2947.63	2588.64	3162.39	-1.11046	0.781	0.163652	0.519882	-0.704669
ENO1_YEAST	Enolase 1 OS=Saccharomyces cerevisiae GN=ENO1 PE=1 SV=2	0.66	1	35522.9	28656.7	12698.3	26407	568.436	10989.1	-2.02499	0.516	0.742103	0.268442	-1.28409
SODE_HUMAN	Extracellular superoxide dismutase [Cu-Zn] OS=Homo sapiens GN=SOD3 PE=1 SV=2	0.83	2	119504	78816	134805	195121	78148.3	155975	1.28854	0.504	0.338375	0.449057	0.838254
FABP4_HUMAN	Fatty acid-binding protein, adipocyte OS=Homo sapiens GN=FABP4 PE=1 SV=3	0.82	1	30590	45065.8	97492.4	18745.5	18792.6	18715.6	-3.07798	2.46e-06	0.305972	0.127664	-1.91733
FBX42_HUMAN	F-box only protein 42 OS=Homo sapiens GN=FBXO42 PE=1 SV=1	0.51	1	946452	914922	754369	361297	868151	915830	-1.2193	0.577	0.273955	0.449177	-0.838014
FGGY_HUMAN	FGGY carbohydrate kinase domain-containing protein OS=Homo sapiens GN=FGGY PE=1 SV=2	0.58	1	33819.8	99098.8	29422.3	24394	75561.1	40359.5	-1.15698	0.853	0.640403	0.80006	-0.270638
FBN1_HUMAN	Fibrillin-1 OS=Homo sapiens GN=FBN1 PE=1 SV=2	1	58	20180000	16390000	15970000	14210000	14580000	20535000	-1.06518	0.931	0.174155	0.684153	-0.437771
FMOD_HUMAN	Fibromodulin OS=Homo sapiens GN=FMOD PE=1 SV=2	1	15	8489870	4.23563e+06	8900323	5667063	5575196	4.96168e+06	-1.3346	0.195	0.21465	0.296759	-1.19883
FINC_HUMAN	Fibronectin OS=Homo sapiens GN=FN1 PE=1 SV=3	1	32	3.84305e+06	5.34498e+06	5242963	5.85732e+06	3.54036e+06	11050000	1.41693	0.24	0.369331	0.427325	0.882553
FBLN1_HUMAN	Fibulin-1 OS=Homo sapiens GN=FBLN1 PE=1 SV=4	0.93	2	449641	287523	155431	99458.3	141555	401264	-1.38974	0.7	0.62938	0.54724	-0.656692
FBLN2_HUMAN	Fibulin-2 OS=Homo sapiens GN=FBLN2 PE=1 SV=2	0.62	1	18121.5	14202.9	13780	36892.7	18466.2	14810.8	1.52198	0.332	0.330893	0.313996	1.15062
FLNA_HUMAN	Filamin-A OS=Homo sapiens GN=FLNA PE=1 SV=4	0.62	1	12526.4	10186.7	10370.8	23041.7	9497.55	17899.8	1.52458	0.242	0.262313	0.223368	1.4397
GBRP_HUMAN	Gamma-aminobutyric acid receptor subunit pi OS=Homo sapiens GN=GABRP PE=1 SV=1	0.67	1	55566.2	43968.5	106446	44187.1	134066	43528.7	1.07671	0.958	0.594268	0.889755	0.14766
GDF6_HUMAN	Growth/differentiation factor 6 OS=Homo sapiens GN=GDF6 PE=2 SV=1	0.68	1	558133	493131	287392	652708	506368	477169	1.2223	0.468	0.244597	0.368773	1.01202
NHP2_HUMAN	H/ACA ribonucleoprotein complex subunit 2 OS=Homo sapiens GN=NHP2 PE=1 SV=1	0.43	1	23456.5	181270	74418.2	33317.5	19043.9	96138.4	-1.87977	0.577	0.847084	0.450915	-0.834548
HBA_HUMAN	Hemoglobin subunit alpha OS=Homo sapiens GN=HBA1 PE=1 SV=2	1	4	797059	509096	292090	1.21008e+06	340372	2.22275e+06	2.36084	0.188	0.612262	0.267465	1.28718
HBB_HUMAN	Hemoglobin subunit beta OS=Homo sapiens GN=HBB PE=1 SV=2	1	5	868267	534193	322606	1.07748e+06	313790	2.80483e+06	2.43243	0.211	0.695431	0.335891	1.09278
HBD_HUMAN	Hemoglobin subunit delta OS=Homo sapiens GN=HBD PE=1 SV=2	0.62	1	54047.5	71749.8	110510	65817.9	38706.2	118834	-1.05797	0.89	0.457014	0.888266	-0.149673
HEMO_HUMAN	Hemopexin OS=Homo sapiens GN=HPX PE=1 SV=2	0.62	1	68851.2	78980.7	75782	134791	128693	121966	1.72373	9.306e-12	0.0596992	0.000345509	11.3337
HRG_HUMAN	Histidine-rich glycoprotein OS=Homo sapiens GN=HRG PE=1 SV=1	0.84	2	3684.76	18284.2	21621.8	11715.1	18803.4	42223.4	1.66875	0.322	0.6575	0.416686	0.904915
SP30L_HUMAN	Histone deacetylase complex subunit SAP30L OS=Homo sapiens GN=SAP30L PE=1 SV=1	0.63	1	11020000	12920000	10600000	5.89968e+06	1.5238e+06	13830000	-1.62515	0.449	0.493947	0.294187	-1.20625
H2A2A_HUMAN	Histone H2A type 2-A OS=Homo sapiens GN=HIST2H2AA3 PE=1 SV=3	1	7	1167179	779242	1.80605e+06	1.23331e+06	2.00199e+06	1.35275e+06	1.22267	0.516	0.342497	0.507316	0.727318
H2AZ_HUMAN	Histone H2A.Z OS=Homo sapiens GN=H2AFZ PE=1 SV=2	0.66	1	26518.7	16095.3	37138	22880.5	34043.2	16986.7	-1.07904	0.917	0.373702	0.816735	-0.247461
H2B1M_HUMAN	Histone H2B type 1-K OS=Homo sapiens GN=HIST1H2BK PE=1 SV=3	1	4	154537	98646.7	243217	191561	391320	118568	1.41307	0.565	0.522239	0.497675	0.744979
H33_HUMAN	Histone H3.3 OS=Homo sapiens GN=H3F3A PE=1 SV=2	0.92	3	431277	499015	1.01894e+06	496842	861671	303884	-1.17254	0.751	0.503023	0.718828	-0.386469
H3C_HUMAN	Histone H3.3C OS=Homo sapiens GN=H3F3C PE=1 SV=3	0.68	1	1192934	755179	3.3528e+06	710233	2.33103e+06	1.04431e+06	-1.29747	0.707	0.707726	0.689545	-0.429707
H4_HUMAN	Histone H4 OS=Homo sapiens GN=HIST1H4A PE=1 SV=2	1	7	718375	640473	1.34685e+06	746883	1.52214e+06	823553	1.14299	0.683	0.421913	0.718208	0.387374
SETD7_HUMAN	Histone-lysine N-methyltransferase SETD7 OS=Homo sapiens GN=SETD7 PE=1 SV=1	0.48	1	61766.1	127573	66540.4	58156.4	50956.9	12633.2	-2.10174	0.194	0.516597	0.153958	-1.75587
CUX2_HUMAN	Homeobox protein cut-like 2 OS=Homo sapiens GN=CUX2 PE=1 SV=4	0.57	1	178386	161150	139028	69036.4	15505.8	190401	-1.74059	0.711	0.550741	0.269363	-1.28118
IGHG1_HUMAN	Ig gamma-1 chain C region OS=Homo sapiens GN=IGHG1 PE=1 SV=1	1	9	1.54118e+06	8.20558e+06	3441894	5751768	5.70248e+06	6.35416e+06	1.35028	0.296	0.421031	0.482877	0.772594
IGHG2_HUMAN	Ig gamma-2 chain C region OS=Homo sapiens GN=IGHG2 PE=1 SV=2	0.99	3	161972	661161	266572	720102	719022	608930	1.87946	0.057	0.409163	0.110631	2.04248
IGKC_HUMAN	Ig kappa chain C region OS=Homo sapiens GN=IGKC PE=1 SV=1	1	4	454650	2.55636e+06	591438	1.03795e+06	1.57236e+06	1.83265e+06	1.23332	0.446	0.626421	0.716303	0.390162
KV308_HUMAN	Ig kappa chain V-III region CLL OS=Homo sapiens PE=1 SV=2	0.67	1	7884.85	27261.4	12808.5	17549.2	16441.9	24738.9	1.2247	0.711	0.430079	0.602954	0.563873
LAC1_HUMAN	Ig lambda-1 chain C regions OS=Homo sapiens GN=IGLC1 PE=1 SV=1	0.99	4	1.22062e+06	2276240	2108414	2.66184e+06	2520822	2.13143e+06	1.30486	0.278	0.208142	0.192563	1.56532
ITIH1_HUMAN	Inter-alpha-trypsin inhibitor heavy chain H1 OS=Homo sapiens GN=ITIH1 PE=1 SV=3	0.49	1	56645.3	24782.2	40235.8	57887.5	26291.9	67370.9	1.24565	0.649	0.409336	0.554274	0.644631
IQEC2_HUMAN	IQ motif and SEC7 domain-containing protein 2 OS=Homo sapiens GN=IQSEC2 PE=2 SV=1	1	5	704620	990568	1.25125e+06	736773	808881	487143	-1.44945	0.07	0.263774	0.17603	-1.64154
IST1_HUMAN	IST1 homolog OS=Homo sapiens GN=KIAA0174 PE=1 SV=1	0.47	1	4683.02	10848.8	7304.98	6420.64	2240.33	5771.51	-1.58232	0.536	0.43706	0.273474	-1.26833
K2C1_HUMAN	Keratin, type II cytoskeletal 1 OS=Homo sapiens GN=KRT1 PE=1 SV=6	0.77	2	59829.5	708346	98125.4	60320.9	41483.6	128796	-3.75673	0.174	0.928919	0.373594	-1.00071
LAMB2_HUMAN	Laminin subunit beta-2 OS=Homo sapiens GN=LAMB2 PE=1 SV=2	0.82	2	89713.4	66395.2	68060.7	115068	83292.1	77029.2	1.22849	0.525	0.198137	0.288648	1.22243
LAMC1_HUMAN	Laminin subunit gamma-1 OS=Homo sapiens GN=LAMC1 PE=1 SV=3	0.68	1	33274.5	32055.6	30406.6	42925.9	31086	31650.7	1.10368	0.652	0.117364	0.448789	0.838789
ACSL4_HUMAN	Long-chain-fatty-acid--CoA ligase 4 OS=Homo sapiens GN=ACSL4 PE=1 SV=2	0.44	1	960753	840536	953028	1.16132e+06	1.7618e+06	1.3078e+06	1.53611	0.00095	0.147646	0.0562659	2.66212
LRN4L_HUMAN	LRRN4 C-terminal-like protein OS=Homo sapiens GN=LRRN4CL PE=2 SV=1	0.53	1	89357.8	71607.4	96774	81303.7	67991.8	83681.2	-1.10629	0.536	0.129705	0.407194	-0.925271
LUM_HUMAN	Lumican OS=Homo sapiens GN=LUM PE=1 SV=2	1	9	1116668	1.46485e+06	1.28206e+06	2329336	2.32892e+06	2.33215e+06	1.80931	9.381e-15	0.0679945	0.000489101	10.365
KDM5D_HUMAN	Lysine-specific demethylase 5D OS=Homo sapiens GN=KDM5D PE=1 SV=2	0.5	1	2741.07	1876.48	1676.17	1651.19	712.737	2136.41	-1.3985	0.65	0.376115	0.322784	-1.12697
LYSC_HUMAN	Lysozyme C OS=Homo sapiens GN=LYZ PE=1 SV=1	0.66	1	47583.5	312723	50309.7	60483.8	48001.6	45041.3	-2.67456	0.076	0.636426	0.385561	-0.973202
DCMC_HUMAN	Malonyl-CoA decarboxylase, mitochondrial OS=Homo sapiens GN=MLYCD PE=1 SV=3	0.61	1	658104	568927	784695	577136	618915	679409	-1.07266	0.711	0.12197	0.547862	-0.65562
GMPPB_HUMAN	Mannose-1-phosphate guanyltransferase beta OS=Homo sapiens GN=GMPPB PE=1 SV=2	0.44	1	26641.7	34347.3	15997.5	8976.08	884.72	40158.8	-1.53913	0.948	0.80141	0.530351	-0.686102
TIMP3_HUMAN	Metalloproteinase inhibitor 3 OS=Homo sapiens GN=TIMP3 PE=1 SV=2	0.88	2	493996	597686	219748	223962	290497	663511	-1.1133	0.986	0.525038	0.814202	-0.25097
MFAP4_HUMAN	Microfibril-associated glycoprotein 4 OS=Homo sapiens GN=MFAP4 PE=1 SV=2	1	4	323394	312861	360312	430739	306305	293431	1.03402	0.941	0.147891	0.818329	0.245254
MFAP2_HUMAN	Microfibrillar-associated protein 2 OS=Homo sapiens GN=MFAP2 PE=2 SV=1	0.7	1	34107.7	48590	32821.4	26384.6	65669.7	26950.9	1.03018	0.986	0.397548	0.937616	0.0832992
MFAP5_HUMAN	Microfibrillar-associated protein 5 OS=Homo sapiens GN=MFAP5 PE=2 SV=1	0.84	1	85065.2	49199.9	44865.6	24010.3	104097	50847.6	-1.00098	0.952	0.52644	0.998362	-0.00218362
TRI18_HUMAN	Midline-1 OS=Homo sapiens GN=MID1 PE=1 SV=1	0.66	1	5896.3	5954.44	3871.75	4153.73	7315.45	3833.42	-1.02744	0.941	0.301802	0.919763	-0.107238
MIME_HUMAN	Mimecan OS=Homo sapiens GN=OGN PE=1 SV=1	1	7	986030	896854	836732	1138409	1181092	1256412	1.31486	1.992e-06	0.0664947	0.00674104	5.15073
MADCA_HUMAN	Mucosal addressin cell adhesion molecule 1 OS=Homo sapiens GN=MADCAM1 PE=1 SV=2	0.68	1	1.16767e+06	1.03787e+06	459540	1.01368e+06	1.03332e+06	565951	-1.01995	0.817	0.36394	0.951026	-0.0653567
MYOC_HUMAN	Myocilin OS=Homo sapiens GN=MYOC PE=1 SV=2	1	4	315874	601031	147644	683313	225195	370378	1.20134	0.853	0.597544	0.724839	0.377701
MYG_HUMAN	Myoglobin OS=Homo sapiens GN=MB PE=1 SV=2	0.68	1	3089.66	1167.75	309064	524.169	37.444	4858.5	-57.8073	5.817e-11	1.5829	0.372606	-1.00302
MYH11_HUMAN	Myosin-11 OS=Homo sapiens GN=MYH11 PE=1 SV=3	0.65	1	12950.3	13786.9	11973.9	55133.3	13883.9	20308.1	2.30748	0.018	0.407864	0.258666	1.31554
MYH6_HUMAN	Myosin-6 OS=Homo sapiens GN=MYH6 PE=1 SV=4	0.59	1	44289	20995	45209.9	74646.1	72892.7	37105.7	1.67108	0.206	0.358396	0.165122	1.69603
MYH9_HUMAN	Myosin-9 OS=Homo sapiens GN=MYH9 PE=1 SV=4	0.68	1	2098.59	716.149	23640.9	2466	533.078	890.944	-6.80091	0.001	1.1254	0.369527	-1.01024
N4BP2_HUMAN	NEDD4-binding protein 2 OS=Homo sapiens GN=N4BP2 PE=1 SV=2	0.55	1	5318.63	5886.36	4198.19	4282.32	1370.66	5410.23	-1.39229	0.671	0.366266	0.328683	-1.11143
DEF3_HUMAN	Neutrophil defensin 3 OS=Homo sapiens GN=DEFA3 PE=1 SV=1	0.68	1	352153	422698	283942	181967	96237.5	291174	-1.85956	0.169	0.355688	0.0778329	-2.358
IKBL2_HUMAN	NF-kappa-B inhibitor-like protein 2 OS=Homo sapiens GN=NFKBIL2 PE=1 SV=2	0.59	1	323652	168877	97257.4	141515	70893.6	187091	-1.47631	0.548	0.514122	0.444619	-0.847158
NOS3_HUMAN	Nitric oxide synthase, endothelial OS=Homo sapiens GN=NOS3 PE=1 SV=3	0.44	1	1.21909e+06	1.92552e+06	3691493	967447	955789	1.91076e+06	-1.78302	0.322	0.493836	0.279373	-1.2502
NECA3_HUMAN	N-terminal EF-hand calcium-binding protein 3 OS=Homo sapiens GN=NECAB3 PE=1 SV=2	0.67	1	11452.6	36877.7	20575.6	29506.6	17698.5	23204.5	1.02182	0.958	0.406265	0.954086	0.0612663
POSTN_HUMAN	Periostin OS=Homo sapiens GN=POSTN PE=1 SV=2	1	16	179956	2.32402e+06	223871	411789	6686709	465688	2.77295	0.615	1.38918	0.504247	0.732912
PA2GA_HUMAN	Phospholipase A2, membrane associated OS=Homo sapiens GN=PLA2G2A PE=1 SV=2	0.99	2	2.32759e+06	4.69176e+06	1.39848e+06	1.69435e+06	1.68879e+06	3.73639e+06	-1.18236	0.968	0.551298	0.735349	-0.362457
PKHA5_HUMAN	Pleckstrin homology domain-containing family A member 5 OS=Homo sapiens GN=PLEKHA5 PE=1 SV=1	0.47	1	173979	138751	212408	150937	152032	73166.7	-1.39614	0.21	0.285564	0.214261	-1.47491
PLEC_HUMAN	Plectin OS=Homo sapiens GN=PLEC PE=1 SV=3	0.45	1	51836.8	29383.9	141697	9458.2	3465.18	50897.2	-3.49289	0.341	1.00699	0.229319	-1.41746
UBC_HUMAN	Polyubiquitin-B OS=Homo sapiens GN=UBB PE=1 SV=1	0.52	1	162862	149033	87612.7	194424	207635	131624	1.33585	0.448	0.264537	0.245998	1.35806
PRELP_HUMAN	Prolargin OS=Homo sapiens GN=PRELP PE=1 SV=1	1	29	12060000	13340000	14790000	13430000	11280000	13340000	-1.05624	0.652	0.0989215	0.53635	-0.67558
PSB6_HUMAN	Proteasome subunit beta type-6 OS=Homo sapiens GN=PSMB6 PE=1 SV=4	0.6	1	595.277	664.882	981.768	1550.13	966.934	1095.18	1.61122	0.37	0.265098	0.098817	2.14244
AMBP_HUMAN	Protein AMBP OS=Homo sapiens GN=AMBP PE=1 SV=1	1	10	13520000	17840000	11930000	13370000	9819945	13400000	-1.18311	0.244	0.190351	0.353243	-1.04933
S10AA_HUMAN	Protein S100-A10 OS=Homo sapiens GN=S100A10 PE=1 SV=2	0.59	1	152964	83634.5	138136	238014	180875	218023	1.69963	0.003	0.214423	0.0314728	3.24673
S10A6_HUMAN	Protein S100-A6 OS=Homo sapiens GN=S100A6 PE=1 SV=1	0.54	1	28497	40769.4	194720	57247	30145.2	32263.8	-2.20621	0.244	0.715286	0.424753	-0.887917
PRG4_HUMAN	Proteoglycan 4 OS=Homo sapiens GN=PRG4 PE=1 SV=2	1	4	635012	620422	1070223	790152	575257	2.02946e+06	1.45975	0.296	0.511667	0.496147	0.747801
CI098_HUMAN	Putative adenylate kinase-like protein C9orf98 OS=Homo sapiens GN=C9orf98 PE=2 SV=1	0.47	1	209560	305516	429536	193269	283576	250084	-1.29946	0.37	0.269332	0.351774	-1.05293
C144B_HUMAN	Putative coiled-coil domain-containing protein 144 N-terminal-like OS=Homo sapiens GN=CCDC144NL PE=5 SV=1	0.6	1	21593.9	17017.1	15716.4	18550.5	10922.7	22435.4	-1.0466	0.952	0.254485	0.843254	-0.210927
P12L1_HUMAN	Putative POM121-like protein 1 OS=Homo sapiens GN=POM121L1P PE=5 SV=2	0.46	1	15475.8	19647	10895	13044.8	25526.3	15593.5	1.17704	0.646	0.325323	0.584338	0.594228
PDPR_HUMAN	Pyruvate dehydrogenase phosphatase regulatory subunit, mitochondrial OS=Homo sapiens GN=PDPR PE=1 SV=2	0.62	1	36015.5	196527	9339.82	30234.1	23060	20915	-3.25947	0.002	0.726564	0.393675	-0.954961
KPYM_HUMAN	Pyruvate kinase isozymes M1/M2 OS=Homo sapiens GN=PKM2 PE=1 SV=4	0.76	1	11933.6	12952.4	21415.8	19089.3	10893.7	21239.9	1.10628	0.652	0.328511	0.725566	0.376645
HTRA1_HUMAN	Serine protease HTRA1 OS=Homo sapiens GN=HTRA1 PE=1 SV=1	0.53	1	68879.8	58403.1	38972.9	38220.1	32720.5	146896	1.31025	0.536	0.5803	0.675912	0.450163
TNI3K_HUMAN	Serine/threonine-protein kinase TNNI3K OS=Homo sapiens GN=TNNI3K PE=1 SV=3	0.55	1	396357	182170	95902.1	176780	82167.8	15778.7	-2.45491	0.313	0.785844	0.256749	-1.32184
TRFE_HUMAN	Serotransferrin OS=Homo sapiens GN=TF PE=1 SV=2	0.62	1	8625.03	22429.6	27439	64866.3	48207.4	87726.8	3.43286	1.936e-05	0.398074	0.020528	3.71701
ALBU_HUMAN	Serum albumin OS=Homo sapiens GN=ALB PE=1 SV=2	1	62	11600000	19610000	13310000	34550000	37240000	38585000	2.47922	6.254e-14	0.170054	0.00126092	8.1031
SAMP_HUMAN	Serum amyloid P-component OS=Homo sapiens GN=APCS PE=1 SV=2	1	10	5572794	4007547	3.41741e+06	3945930	3.03605e+06	5.00025e+06	-1.08475	0.941	0.251598	0.713223	-0.394674
NHDC1_HUMAN	Sodium/hydrogen exchanger-like domain-containing protein 1 OS=Homo sapiens GN=NHEDC1 PE=2 SV=2	0.59	1	707248	643174	430509	211360	504032	651810	-1.30261	0.615	0.367949	0.421389	-0.894973
SNX13_HUMAN	Sorting nexin-13 OS=Homo sapiens GN=SNX13 PE=1 SV=4	0.55	1	80623.8	185424	147678	57363	373854	156612	1.42082	0.539	0.605496	0.586866	0.59007
STON1_HUMAN	Stonin-1 OS=Homo sapiens GN=STON1 PE=1 SV=2	0.58	1	47768.8	52897.7	41906.1	28711.2	49208.3	45860.8	-1.15182	0.618	0.191114	0.427357	-0.882487
MMP3_HUMAN	Stromelysin-1 OS=Homo sapiens GN=MMP3 PE=1 SV=2	1	4	294316	476559	674906	279263	187684	207784	-2.14275	0.000717	0.304492	0.0859843	-2.26729
SRPX_HUMAN	Sushi repeat-containing protein SRPX OS=Homo sapiens GN=SRPX PE=2 SV=1	0.67	1	23329.4	59481.3	1	33326.9	3010.56	25297.3	-1.34359	0.531	0.925111	0.73612	-0.361344
SRPX2_HUMAN	Sushi repeat-containing protein SRPX2 OS=Homo sapiens GN=SRPX2 PE=1 SV=1	0.97	2	159171	281055	150146	141198	102328	283379	-1.12045	0.986	0.457101	0.77555	-0.30504
TENA_HUMAN	Tenascin OS=Homo sapiens GN=TNC PE=1 SV=2	0.98	3	107463	270559	116355	138484	214256	268716	1.25705	0.488	0.436114	0.550342	0.65136
TENX_HUMAN	Tenascin-X OS=Homo sapiens GN=TNXB PE=1 SV=2	1	9	622628	456508	933638	1.04889e+06	728699	1.29893e+06	1.5285	0.056	0.319863	0.176501	1.63927
TNMD_HUMAN	Tenomodulin OS=Homo sapiens GN=TNMD PE=2 SV=1	0.67	1	552479	324711	530137	411162	664355	317727	-1.01011	0.753	0.326905	0.972154	-0.0371392
TSP1_HUMAN	Thrombospondin-1 OS=Homo sapiens GN=THBS1 PE=1 SV=2	1	5	1.30991e+06	701705	645156	573863	260459	467076	-2.04147	0.018	0.39173	0.123113	-1.94889
TSP4_HUMAN	Thrombospondin-4 OS=Homo sapiens GN=THBS4 PE=1 SV=2	1	15	4171316	3.39371e+06	5314692	4341433	4.31534e+06	6914273	1.20896	0.242	0.256361	0.431591	0.873715
TACC3_HUMAN	Transforming acidic coiled-coil-containing protein 3 OS=Homo sapiens GN=TACC3 PE=1 SV=1	0.55	1	39765.1	38658.3	28983.5	23570.7	28692.7	29546.8	-1.31288	0.359	0.142093	0.0939139	-2.18788
BGH3_HUMAN	Transforming growth factor-beta-induced protein ig-h3 OS=Homo sapiens GN=TGFBI PE=1 SV=1	1	11	1.55891e+06	1.48344e+06	1.98666e+06	1.48794e+06	1.95707e+06	2.39633e+06	1.16153	0.301	0.197598	0.425528	0.886299
TM109_HUMAN	Transmembrane protein 109 OS=Homo sapiens GN=TMEM109 PE=1 SV=1	0.47	1	30428.1	14267.6	24730.6	32538.7	40744.2	43022.9	1.67524	0.047	0.248208	0.0519159	2.73981
TTHY_HUMAN	Transthyretin OS=Homo sapiens GN=TTR PE=1 SV=1	0.88	2	49484.9	45067.8	35826.9	52576.9	115505	69958.7	1.82575	0.023	0.284965	0.134803	1.87018
TBA1B_HUMAN	Tubulin alpha-1B chain OS=Homo sapiens GN=TUBA1B PE=1 SV=1	0.89	1	148406	81072	61270.2	126445	47434	91921	-1.09386	0.729	0.459188	0.823405	-0.238236
TBB3_HUMAN	Tubulin beta-2C chain OS=Homo sapiens GN=TUBB2C PE=1 SV=1	0.47	1	92127.3	60606.4	60063.9	97773.3	44520.4	87833.6	1.08144	0.884	0.313965	0.781612	0.296491
UBP2L_HUMAN	Ubiquitin-associated protein 2-like OS=Homo sapiens GN=UBAP2L PE=1 SV=2	0.49	1	4506.83	6203.5	3568.47	8884.85	5484.91	5650.53	1.4021	0.34	0.283928	0.228947	1.41883
K0802_HUMAN	Uncharacterized protein KIAA0802 OS=Homo sapiens GN=KIAA0802 PE=1 SV=3	0.49	1	669860	603667	651273	569029	553438	301012	-1.35218	0.078	0.185134	0.133865	-1.87622
VIME_HUMAN	Vimentin OS=Homo sapiens GN=VIM PE=1 SV=4	0.99	3	177911	143851	139116	351893	159177	414635	2.00857	0.019	0.284597	0.11733	1.9909
VTNC_HUMAN	Vitronectin OS=Homo sapiens GN=VTN PE=1 SV=1	1	6	6449484	3050292	3.20201e+06	2515492	1.51042e+06	3.24725e+06	-1.74639	0.134	0.406604	0.21143	-1.48616
SORC3_HUMAN	VPS10 domain-containing receptor SorCS3 OS=Homo sapiens GN=SORCS3 PE=2 SV=2	0.77	2	228346	177157	263443	300438	157923	296370	1.12824	0.662	0.258548	0.618921	0.538309
WISP2_HUMAN	WNT1-inducible-signaling pathway protein 2 OS=Homo sapiens GN=WISP2 PE=1 SV=1	0.45	1	9621.89	8725.98	14398.3	15955.1	18625.7	7854.91	1.2959	0.565	0.337941	0.430354	0.87627
ZSCA1_HUMAN	Zinc finger and SCAN domain-containing protein 1 OS=Homo sapiens GN=ZSCAN1 PE=2 SV=2	0.52	1	37802.3	58293.3	171521	92786.8	255994	36907.4	1.4412	0.705	0.846416	0.639441	0.506044
ZN274_HUMAN	Zinc finger protein 274 OS=Homo sapiens GN=ZNF274 PE=1 SV=1	0.6	1	76870.9	26069.3	76617.6	259421	235153	51099.9	3.03899	0.056	0.557558	0.146713	1.79721
ZN469_HUMAN	Zinc finger protein 469 OS=Homo sapiens GN=ZNF469 PE=1 SV=3	0.45	1	505171	409643	1.01419e+06	227296	202127	259212	-2.80119	2.656e-05	0.315027	0.0931633	-2.19507
ZNF45_HUMAN	Zinc finger protein 7 OS=Homo sapiens GN=ZNF7 PE=1 SV=1	0.47	1	31439.9	20189	29426.8	49807.5	52958.7	6039.21	1.34235	0.344	0.472591	0.583569	0.595495
